# Supplementary material
Source: publisher figshare collection journal article supplement (https://acs.figshare.com/ndownloader/files/4521517)
Supplement: Supplementary file 1 [file 4521517]

## Synthesis and Crystal Structure of NZP-Type Thorium-Zirconium Phosphate

Albina I. Orlova,<sup>a</sup> Valeriy Yu. Volgutov,<sup>a</sup> Germán R. Castro,<sup>b</sup> Santiago García-Granda,<sup>c</sup>

Sergei A. Khainakov,<sup>c</sup> José R. García<sup>c</sup>

<sup>a</sup> Department of Chemistry, Nizhni Novgorod State University, pr. Gagarina 23, 603950 Nizhni Novgorod, Russia

<sup>b</sup> SpLine, Spanish CRG Beamline, ESRF, BP 220, F-38043 Grenoble Cedex, France

<sup>c</sup> Departamentos de Química Física y Analítica y Química Orgánica e Inorgánica, Universidad de Oviedo, 33006 Oviedo, Spain

### Electronic Supplementary Information

**Synthesis.**  $\text{Th}_{1/4}\text{Zr}_2(\text{PO}_4)_3$  microcrystal powder synthesis was carried out by sol-gel technology including organic complex formation and etherification processes (Pechini method) (Pechini, M.P. *US Patent 1967*, 3330697; Kakihana, M. *J. Sol-Gel Sci. Technol.* **1996**, 6, 7). Reagent-grade  $\text{Th}(\text{NO}_3)_4 \cdot 4.3\text{H}_2\text{O}$ ,  $\text{ZrOCl}_2 \cdot 8\text{H}_2\text{O}$  and  $\text{NH}_4\text{H}_2\text{PO}_4$  were used as starting materials in a molar ratio 1:8:12 (Th:Zr:P) with citric acid (CA) as polymer precursor and distilled water as solvent. Thorium nitrate has been dissolved in 1 M  $\text{ZrOCl}_2$  aqueous solution and, later, citric acid (molar ratio  $\text{CA}:\text{M}^{\text{IV}} = 15:1$ ;  $\text{M}^{\text{IV}} = \text{Th}+\text{Zr}$ ) was added. After homogenization of the solution, ethylene glycol (EG) (molar relation  $\text{EG}:\text{CA} = 4:1$ ), dissolved in 1 M  $\text{NH}_4\text{H}_2\text{PO}_4$ , was dropped with permanent stirring. By heating at 100 °C, CA-EG esterification-polymerization was accelerated to produce a viscous gel that was dried at 150 °C. Then powder was sequentially heated at 600, 700, 800, 900, 1000 and 1100 °C during 24 hours in each stage. After each heating process, the powder have been grinded in agate mortar and their powder X-ray pattern was collected on a conventional powder diffractometer Shimadzu LabX XRD-6000 (Fig. 1). When  $T \leq 800$  °C, the material is amorphous. At  $T = 900$ -1000 °C a new compound ( $\text{Th}_{1/4}\text{Zr}_2(\text{PO}_4)_3$ ), with  $\text{NaZr}_2(\text{PO}_4)_3$  type structure, was obtained. When  $T \geq 1100$  °C, the solid transform to a multiphase material, where several crystalline phases ( $\text{Zr}_2\text{P}_2\text{O}_9$ ,  $\text{ThP}_2\text{O}_7$ ,  $\text{ZrP}_2\text{O}_7$ ,  $\text{ThO}_2$ ,  $\text{ZrO}_2$ ) were detected.

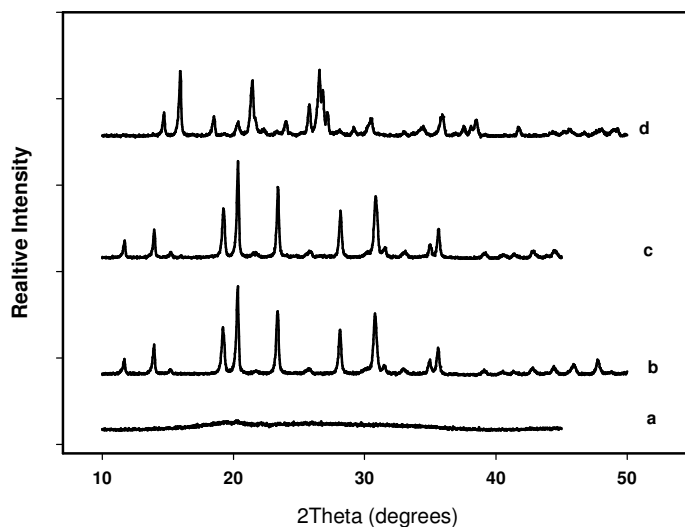

**Figure 1.** Powder X-ray diffraction patterns of the samples as a function of treatment temperature: a) 800 °C, b) 900 °C, c) 1000 °C and d) 1100 °C.

**Analytical data for the sample obtained at 900 °C.** Infrared absorption spectra (Fig. 2) were recorded on a Shimadzu IR Prestige-21 FT spectrophotometer by the KBr pellet technique. The vibrations of the P-O bonds are observed from 500 to 640  $\text{cm}^{-1}$  ( $\nu_{\text{as}}$ ), 920 to 980  $\text{cm}^{-1}$  ( $\nu_{\text{s}}$ ), and about 1000 to 1160  $\text{cm}^{-1}$  ( $\nu_{\text{as}}$ ). SEM (recorded with a JEOL JSM-6100 electron microscope operating at 20 kV) and TEM (recorded with JEOL-2000EX-II electron microscope operating at 200 kV) micrographs (Figs. 3 and 4) reveal a platelike morphology for irregular particles with size from 20 to 70 nm. Energy dispersive X-ray analysis are coherent with the  $\text{Th}_{1/4}\text{Zr}_2(\text{PO}_4)_3$  composition.

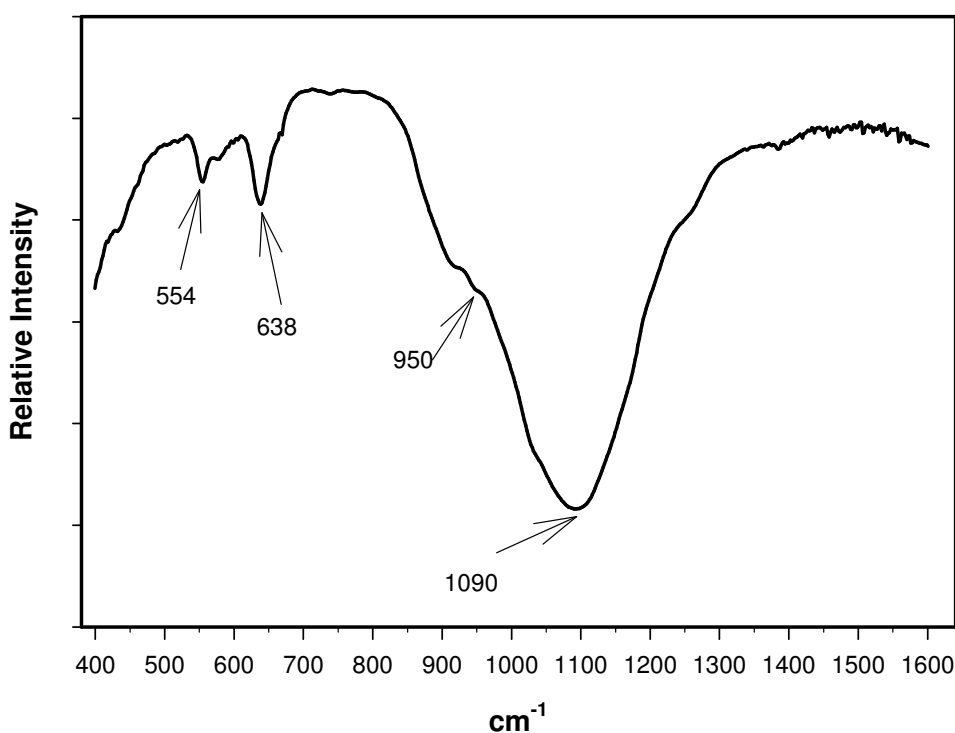

**Figure 2.** IR spectra of  $\text{Th}_{1/4}\text{Zr}_2(\text{PO}_4)_3$

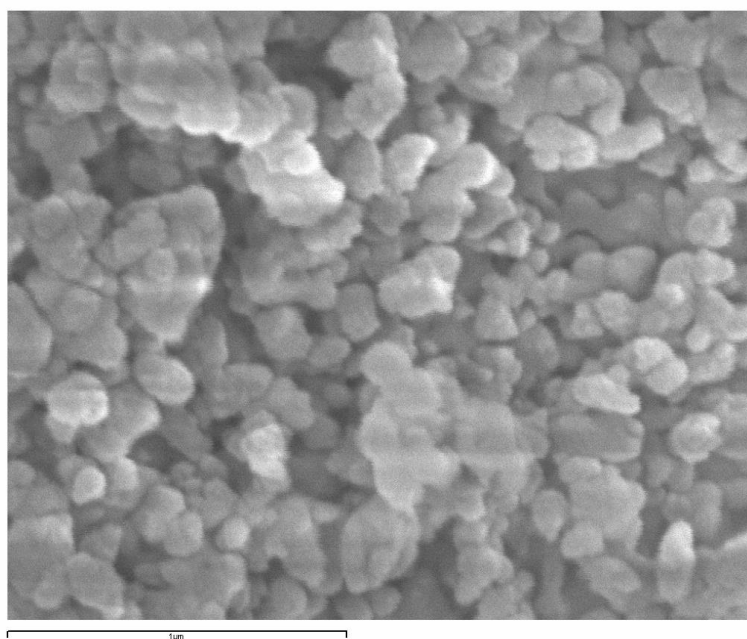

**Figure 3.** SEM image of  $\text{Th}_{1/4}\text{Zr}_2(\text{PO}_4)_3$  (50000x magnification).

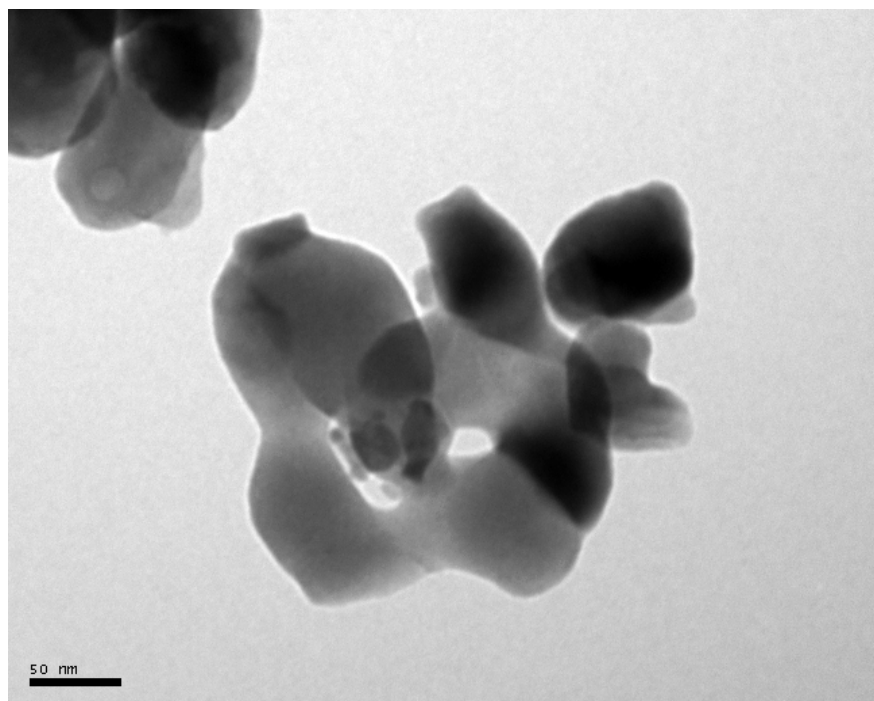

**Figure 4.** TEM image of  $\text{Th}_{1/4}\text{Zr}_2(\text{PO}_4)_3$  (200000x magnification).

**Powder diffraction data.**  $\text{Th}_{1/4}\text{Zr}_2(\text{PO}_4)_3$  X-ray powder diffraction pattern was recorded at beamline BM25A at the European Synchrotron Radiation Facility (ESRF), Grenoble (France). The sample was finely ground and loaded in a 0.5 mm diameter capillary. This capillary was mounted in a rotatory goniometer. Room-temperature data were collected in the continuous  $2\theta$ -scan mode from  $3^\circ$  to  $60^\circ$  using an incident wavelength of  $0.82456 \text{ \AA}$  (calibrated with silicon powder;  $a = 5.430825 \text{ \AA}$ ). The counts from the different channels were rebinned to produce an equivalent normalized step scan of  $0.02^\circ$  step intervals. The pattern was indexed using the program TREOR (Werner, P.E.; Eriksson, L.; Westdahl, M. *J. Appl. Crystallogr.* **1985**, 18, 367) in the hexagonal system with lattice parameters  $a = b = 8.749(1) \text{ \AA}$ ,  $c = 23.355(8) \text{ \AA}$  and figures of merit:  $M_{17} = 19$ ,  $F_{17} = 29$  (0.007, 79) and DICVOL04 (Boultif, A. & Louer, D. *J. Appl. Crystallogr.* **2004**, 37, 724) in the hexagonal system with lattice parameters  $a = b = 8.741(2) \text{ \AA}$ ,  $c = 23.349(6) \text{ \AA}$  and figures of merit:  $M_{20} = 25$ ,  $F_{20} = 54$  (0.004, 87). Systematic absences were consistent with the space group  $P\bar{3}c$  (No. 165). The structure refinement based on  $\text{Eu}_{1/3}\text{Zr}_2(\text{PO}_4)_3$  structural model was carried out using the Rietveld method as implemented in the program GSAS (Larson, A.C.; Von Dreele, R.B. *General Structure Analysis System (GSAS)*; Los Alamos National Laboratory, Report LAUR, 1994; p 86). Initial least squares refinements of the profile included terms for the scale factor, background, lattice parameters, zero point, and peak shape. Atomic positions  $\text{Th}_{1/4}\text{Zr}_2(\text{PO}_4)_3$  were refined with soft constraints consisting of Zr-O and P-O bond distances. The refinement of the positional parameters as well as their thermal parameters in isotropic approximation converged with the following final unit cell parameters:  $a = b = 8.7311(4) \text{ \AA}$ ,  $c = 23.3090(19) \text{ \AA}$ ,  $Z = 6$  and  $V = 1538.79(23) \text{ \AA}^3$ . Finally, 42 parameters were refined and gave good reliability factors  $R_p = 0.071$  and  $R_{wp} = 0.092$  (see Fig. 5).

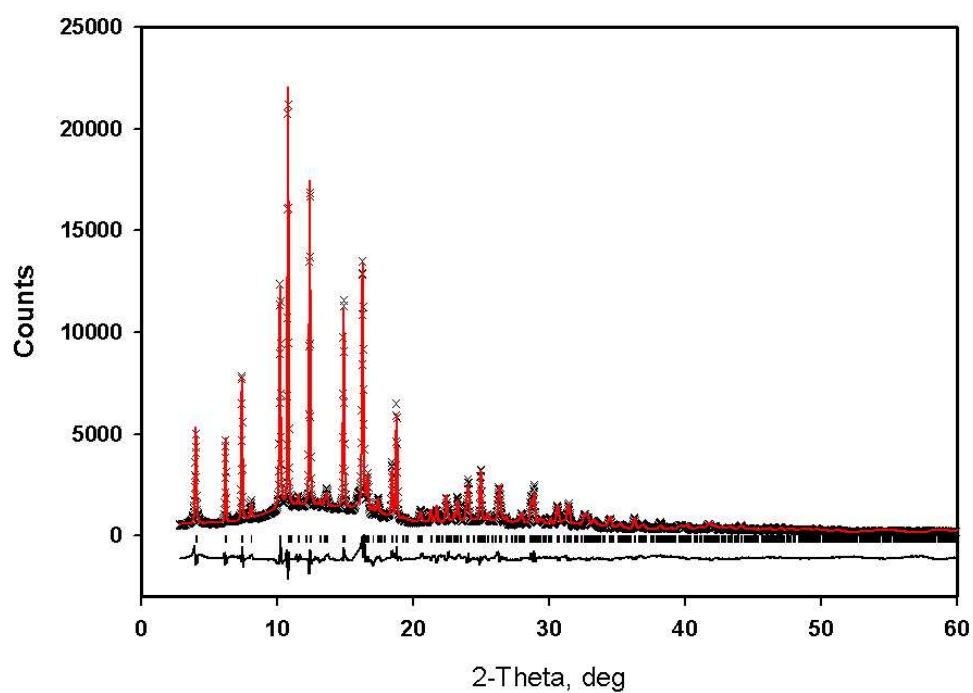

**Figure 5.** X-ray diffraction powder patterns of  $\text{Th}_{1/4}\text{Zr}_2(\text{PO}_4)_3$ . Observed (x), calculated (line) and difference (below) profiles are plotted on the same scale. Bragg peaks are indicated by tick marks.

**Structural details.** See “ThZrP-Oviedo-IC.cif” file.
